# Supplementary material
Source: PubMed Central journal article supplement (PMC3933309)
Supplement: NIHMS550155-supplement-Supplementary_Data.pdf [file NIHMS550155-supplement-Supplementary_Data.pdf]

**SUPPLEMENTAL TABLE 1. Baseline characteristics of HIV-infected FRAM participants by Leg Muscle Tertile\***

|                                      | Tertile 1 (lowest)<br>(n = 310) | Tertile 2<br>(n = 314) | Tertile 3 (highest)<br>(n = 298) | P-value |
|--------------------------------------|---------------------------------|------------------------|----------------------------------|---------|
| Age (y)                              | 44.0 (38.0–50.0)                | 42.0 (36.0–49.0)       | 41.0 (36.0–46.0)                 | <.0001  |
| Female                               | 30%                             | 29%                    | 30%                              | 0.84    |
| Race: African-American               | 34%                             | 37%                    | 47%                              | 0.0007  |
| Caucasian                            | 52%                             | 53%                    | 39%                              |         |
| Other                                | 14%                             | 10%                    | 14%                              |         |
| Diabetes                             | 6%                              | 8%                     | 12%                              | 0.0023  |
| Smoking Status: Current              | 47%                             | 47%                    | 34%                              | 0.0012  |
| Past                                 | 22%                             | 21%                    | 24%                              |         |
| Never                                | 31%                             | 32%                    | 42%                              |         |
| Antihypertensive use                 | 20%                             | 20%                    | 24%                              | 0.22    |
| ACE-I use                            | 10%                             | 8%                     | 9%                               | 0.57    |
| Hyperlipidemia Treatment             | 14%                             | 15%                    | 18%                              | 0.076   |
| Systolic BP (mmHg)                   | 113.0 (105.0–123.0)             | 115.0 (106.0–124.0)    | 118.0 (109.0–125.0)              | 0.0001  |
| Diastolic BP (mmHg)                  | 77.0 (70.0–83.0)                | 77.5 (70.0–83.0)       | 80.0 (73.0–87.0)                 | 0.0001  |
| Waist Circumference (cm)             | 84.0 (77.1–91.3)                | 87.8 (81.5–95.5)       | 94.3 (86.6–101.5)                | <.0001  |
| Total Cholesterol (mg/dL)            | 190.0 (161.0–230.0)             | 189.0 (154.0–232.0)    | 193.0 (162.0–218.0)              | 0.77    |
| HDL (mg/dL)                          | 43.0 (34.0–54.0)                | 40.0 (33.0–53.0)       | 40.0 (34.0–51.0)                 | 0.052   |
| CRP (mg/L)                           | 2.2 (0.9–4.7)                   | 1.6 (0.7–3.8)          | 1.7 (0.8–4.0)                    | 0.036   |
| Fibrinogen (mg/dL)                   | 385 (314–474)                   | 354 (284–421)          | 344 (293–409)                    | <.0001  |
| eGFRcys (mL/min/1.73m <sup>2</sup> ) | 80 (66–97)                      | 86 (72–100)            | 89 (73–103)                      | <.0001  |
| Albuminuria                          | 24%                             | 17%                    | 21%                              | 0.19    |
| HIV-Related Factors                  |                                 |                        |                                  |         |
| Detectable HIVRNA                    | 51%                             | 46%                    | 52%                              | 0.91    |
| Current CD4 count (cells/μL)         | 339 (169–566)                   | 366 (225–509)          | 407 (247–566)                    | <.0001  |
| Detectable HCVRNA                    | 24%                             | 23%                    | 17%                              | 0.021   |
| History of AIDS **                   | 70%                             | 75%                    | 68%                              | 0.53    |
| HAART use (ever)                     | 90%                             | 89%                    | 86%                              | 0.075   |

\* Statistics estimated using IPCW weights. Continuous data are represented as median (IQR). Note: Leg SM is adjusted for height and then tertiled, with cutpoints of: T1 = <9.1 kg for women, <10.5 kg for men. T2 = 9.1–11.1 kg for women, 10.5–12.2 kg for men; T3 = >11.1 kg for women, >12.2 kg for men. \*\* AIDS defined by CD4<200 or history of opportunistic infection or malignancy

**SUPPLEMENTAL TABLE 2. Association of MRI measures of muscle and adiposity with 5-year Mortality in HIV-infected FRAM participants, stratified by CD4 Count\***

|                   | Final model (all participants)<br>OR (95% CI) P-value | Sensitivity Analysis restricted<br>to CD4>200 OR (95% CI) P-value | Sensitivity Analysis restricted to<br>CD4<200 OR (95% CI) P-value |
|-------------------|-------------------------------------------------------|-------------------------------------------------------------------|-------------------------------------------------------------------|
| Arm SM: T2 vs. T1 | 0.59 (0.35, 0.99) p=0.044                             | 0.38 (0.18, 0.81) p=0.013                                         | 0.90 (0.36, 2.22) p=0.81                                          |
| Arm SM: T3 vs. T1 | 0.51 (0.25, 1.04) p=0.062                             | 0.46 (0.20, 1.05) p=0.065                                         | 0.28 (0.060, 1.32) p=0.10                                         |
| VAT: T2 vs. T1    | 1.77 (1.03, 3.03) p=0.039                             | 2.25 (1.05, 4.86) p=0.038                                         | 1.58 (0.65, 3.87) p=0.31                                          |
| VAT: T3 vs. T1    | 2.12 (1.13, 3.98) p=0.019                             | 2.54 (0.94, 6.88) p=0.065                                         | 2.05 (0.72, 5.80) p=0.18                                          |
| Leg SM: T2 vs. T1 | 0.92 (0.54, 1.57) p=0.75                              | 1.83 (0.92, 3.65) p=0.086                                         | 0.34 (0.14, 0.83) p=0.018                                         |
| Leg SM: T3 vs. T1 | 0.42 (0.21, 0.84) p=0.015                             | 0.78 (0.30, 2.02) p=0.60                                          | 0.16 (0.042, 0.58) p=0.0061                                       |

Estimates from multivariable adjusted models controlling for age, sex, race, traditional CVD risk factors, HIV-related factors, CRP, fibrinogen, eGFRcys, albuminuria, arm SM, leg SM, and VAT.

**SUPPLEMENTAL TABLE 3. Baseline characteristics of HIV-infected FRAM participants by VAT Tertile\***

|                                                  | Tertile 1 (lowest)<br>(n = 298) | Tertile 2<br>(n = 324) | Tertile 3 (highest)<br>(n = 300) | P-value |
|--------------------------------------------------|---------------------------------|------------------------|----------------------------------|---------|
| Age (y)                                          | 41.0 (36.0–47.0)                | 42.0 (37.0–48.0)       | 44.0 (38.0–51.0)                 | <.0001  |
| Female                                           | 30%                             | 28%                    | 31%                              | 0.78    |
| Race: African-American                           | 57%                             | 37%                    | 24%                              | <.0001  |
| Caucasian                                        | 32%                             | 49%                    | 63%                              |         |
| Other                                            | 11%                             | 15%                    | 13%                              |         |
| Diabetes                                         | 5%                              | 7%                     | 14%                              | <.0001  |
| Smoking Status: Current                          | 53%                             | 40%                    | 36%                              | <.0001  |
| Past                                             | 18%                             | 23%                    | 26%                              |         |
| Never                                            | 30%                             | 38%                    | 38%                              |         |
| Antihypertensive use                             | 15%                             | 21%                    | 29%                              | <.0001  |
| ACE-I use                                        | 5%                              | 10%                    | 12%                              | 0.0022  |
| Hyperlipidemia Treatment                         | 6%                              | 15%                    | 26%                              | <.0001  |
| Systolic BP (mmHg)                               | 112.0 (104.0–120.0)             | 115.0 (106.0–125.0)    | 119.0 (110.0–128.0)              | <.0001  |
| Diastolic BP (mmHg)                              | 76.0 (69.0–80.0)                | 79.0 (71.0–84.0)       | 80.0 (72.0–88.0)                 | <.0001  |
| Waist Circumference (cm)                         | 79.6 (75.2–85.1)                | 88.1 (83.5–93.5)       | 97.4 (92.5–103.5)                | <.0001  |
| Total Cholesterol (mg/dL)                        | 177.0 (147.0–210.0)             | 191.0 (160.0–226.0)    | 204.0 (169.0–245.0)              | <.0001  |
| HDL (mg/dL)                                      | 45.0 (36.0–57.0)                | 40.0 (33.0–52.0)       | 38.0 (32.0–48.0)                 | <.0001  |
| CRP (mg/L)                                       | 1.4 (0.6–3.3)                   | 1.7 (0.8–3.7)          | 2.5 (1.0–4.7)                    | <.0001  |
| Fibrinogen (mg/dL)                               | 363 (296–443)                   | 352 (293–448)          | 370 (297–421)                    | 0.34    |
| eGFR <sub>cys</sub> (mL/min/1.73m <sup>2</sup> ) | 86 (72–103)                     | 86 (72–103)            | 84 (69–98)                       | 0.78    |
| Albuminuria                                      | 21%                             | 20%                    | 22%                              | 0.76    |
| HIV-Related Factors                              |                                 |                        |                                  |         |
| Detectable HIVRNA                                | 60%                             | 48%                    | 41%                              | <.0001  |
| Current CD4 count (cells/μL)                     | 286 (162–479)                   | 385 (238–559)          | 438 (273–628)                    | <.0001  |
| Detectable HCVRNA                                | 26%                             | 23%                    | 14%                              | <.0001  |
| History of AIDS **                               | 74%                             | 69%                    | 68%                              | 0.061   |
| HAART use (ever)                                 | 87%                             | 88%                    | 89%                              | 0.32    |

\* Statistics estimated using IPCW weights. Continuous data are represented as median (IQR). Note: VAT is adjusted for height and then tertiled, with cutpoints of: T1 = <0.8 kg for women, <0.9 kg for men; T2 = 0.8–1.9 kg for women, 0.9–2.3 kg for men; T3 = >1.9 kg for women, >2.3 kg for men.

\*\* AIDS defined by CD4<200 or history of opportunistic infection or malignancy
